# Supplementary material for: Adaptation of Fe-S Cluster Assembly to Rising O2 Levels over Geological Time
Source: Research Square preprint supplement (doi:10.21203/rs.3.rs-7916008/v1), 2026-01-08
Supplement: Supplementary file 1 [file 048a34b7f0e99934d980a80b.xlsx]

## Sheet: Sheet1
Supplementary Table 3 Primers in this research
Primer Name	Nucleotide sequences (5’-3’)
pET30-T7-lac-F	CTCACTATAGGGGAATTGTGAGCG
pET30-T7-R	TTATGCTAGTTATTGCTCAGCGGTGG
SL_MBP_HR -F	GGCGGCCGCGATATCGTCGACATGACCTTCGATATCGATGCTATCCG
SL_MBP_HR -R	TGAGCCTTTCGTTTTATTTGATCAGCCACCCAGCAGTTCGA
pTar-rank1-F	TCAGTCCTAGGTATAATACTAGTGCATACCGATAACCCCACCGGTTTTAGAGCTAGAAATAGCAAG
pTar-rank1-R	CTTGCTATTTCTAGCTCTAAAACCGGTGGGGTTATCGGTATGCACTAGTATTATACCTAGGACTGA
pTar-rank2-F	TCAGTCCTAGGTATAATACTAGTAGCCATACCTGAACACCCGGGTTTTAGAGCTAGAAATAGCAAG
pTar-rank2-R	CTTGCTATTTCTAGCTCTAAAACCCGGGTGTTCAGGTATGGCTACTAGTATTATACCTAGGACTGA
pTar-rank3-F	TCAGTCCTAGGTATAATACTAGTGGTTGCAGATTGCTGTACGGCGGGTTTTAGAGCTAGAAATAGCAAG
pTar-rank3-R	CTTGCTATTTCTAGCTCTAAAACCCGCCGTACAGCAATCTGCAACCACTAGTATTATACCTAGGACTGA
p5-up-F	GATGGCGACCGAGATGGA
p5-up-R-m	GTATTCTGCGATGCTCAGTTCTCCTGATTCCGATACCGATTA
p5-down-F-m	TTGTGATGCTCGTCAGGGGCCATTCCGTGGACGAGGTT
p5-down-R	CGCATCGTACAGTGCTTCGC
p5-MVA-F	ATCGGTATCGGAATCAGGAGAACTGAGCATCGCAGAATACG
p5-MVA-R	AACCTCGTCCACGGAATGGCCCCTGACGAGCATCACAAAA
p5-up-F-hT	CTAGAGTCGACCTGCAGAAGCGATGGCGACCGAGATGGA
p5-down-R-hT	CGATCATAGCACGATCAACGGCGCATCGTACAGTGCTTCGC
pTarT-p5-homo-iscUR	CCGTTGATCGTGCTATGAT
pTarT-p5-homo-iscUF	GCTTCTGCAGGTCGACTC
pF3-F	TGAATCGAACCGTTTTCGGATC
Veri3-R	GTTCCGGCACTCTGCCTG
HindIII-His-SufE-R	CCCAAGCTTTTAATGATGATGATGATGATGGCTAAGTGCAGCGGCTTTG
XhoI-SufE-F	CCGCTCGAGAATGGCTTTATTGCCGGATAAAGAAAAGTTGC
XhoI-SufE-GOE-F	CCGCTCGAGAATGGCGAGCCTGCCG
HindIII-SufE-GOE-R	CCCAAGCTTTCATTCGTTGTTCTGAGACAGAGC
XhoI-SufE-LCA-F	CCGCTCGAGAATGGCGGCGCTGCC
HindIII-SufE-LCA-R	CCCAAGCTTTCAAACCAGCTGCGCAGCAC
pbad-SufSE-F	CCGCTCGAGAATGATTTTTTCCGTCGAC
pbad-SufSE-R	CCCAAGCTTTTAGCTAAGTGCAGCG
SufS-GOE-F-XhoI	CCGCTCGAGAATGAGCTTTAGCATCGAAAAAGTTCGC
SufS-GOE-R	CATAGTGCCTCCCTGTTAGCCGCCCAGCAGTTTTTCG
SufE-GOE-F	GGCTAACAGGGAGGCACTATGGCGAGCCTGCCG
HindIII-His-SufE-GOE-R	CCCAAGCTTTCAATGATGATGATGATGATGTTCGTTGTTCTGAGACAGAGCAGC
MBP-SufS-LCA	CCGCTCGAGAGAAGAAGGTAAACTGGTAATCTGGATTAACGG
SufS-LCA-R	CGCCATAGTGCCTCCCTGTCAGCCACCCAGCAGTTCG
SufE-LCA-F	GGCTGACAGGGAGGCACTATGGCGGCGCTGCCG
HindIII-His-SufE-LCA-R	CCAAGCTTTCAATGATGATGATGATGATGAACCAGCTGCGCAGCAC
