# Supplementary material for: Adaptation of Fe-S Cluster Assembly to Rising O2 Levels over Geological Time
Source: Research Square preprint supplement (doi:10.21203/rs.3.rs-7916008/v1), 2026-01-08
Supplement: Supplementary file 2 [file 6b6b3b6f6981801555775657.xlsx]

## Sheet: Sheet1
Supplementary Table 2 Marginal likelihood value of different clock models and calibration sets under the sampling mode of stepping-stone
Clock models	TP1_euk1	TP1_euk2	TP2_euk1	TP2_euk2	TP3_euk1	TP3_euk2	TP4_euk1	TP4_euk2
IR_C1	-6749.76	-6734.02	-6903.36	-6942.31	-6789.14	-6800.04	-7078.54	-7101.95
IR_C2	-6751.51	-6671.77	-6917.86	-6911.06	-6813.59	-6762.94	-7075.57	-7112.27
IR_C3	-6728.52	-6697.12	-6958.47	-6923.24	-6794.41	-6779.79	-7106.89	-7098.84
IR_C4	-6729.02	-6731.22	-6928.01	-6943.05	-6803.03	-6782.04	-7067.45	-7112.77
IR_C5	-6758.88	-6718.66	-6942.77	-6949.91	-6787.43	-6785.86	-7118.28	-7106.59
IR_C6	-6696.77	-6732.68	-6927.04	-6930.72	-6787.16	-6792.71	-7092.3	-7147.37
AR_C1	-6593.02	-6585.37	-6739.27	-6817.74	-6608.28	-6667.86	-6886.28	-6904.64
AR_C2	-6584.51	-6567.7	-6754	-6742.26	-6629.51	-6669.42	-6897.58	-6942.75
AR_C3	-6568.93	-6592.68	-6734.37	-6761.77	-6609.77	-6675.54	-6907.47	-6888.81
AR_C4	-6559.66	-6585.15	-6756.86	-6748.38	-6611.16	-6652.54	-6873.93	-6845.41
AR_C5	-6531.8*	-6600.72	-6753.31	-6732	-6593.76	-6626.08	-6927.96	-6887.91
AR_C6	-6580.19	-6593.75	-6725.33	-6745.19	-6609.11	-6629.84	-6876.03	-6889.07
