# Supplementary material for: Adaptation of Fe-S Cluster Assembly to Rising O2 Levels over Geological Time
Source: Research Square preprint supplement (doi:10.21203/rs.3.rs-7916008/v1), 2026-01-08
Supplement: Supplementary file 3 [file 9d411032e4a9b90f15d2463d.xlsx]

## Sheet: Sheet1
Supplementary Table 1 Calibration Node and Time Constrain
Calibration sets	Roota	Node2 (Total group of Cyanobacteria)	Node3 (Total of Nostocales)	Node4 (Total of Pleurocapsales)	Node5 (Total of Bangiales)	Node6 (Total group of Florideophyceae)	Node7 (Crown group of Embryophyta)	Node8 (Total group of angiosperm)
C1_Euk1	>4000<4500	>2320<3000	>1600	>1700	>1033	>550	>450<509	>125<250
C1_Euk2	>4000<4500	>2320<3000	>1600	>1700	>1600	>550	>450<509	>125<250
C2_Euk1	>4000<4500	>2500<3000	>1600	>1700	>1033	>550	>450<509	>125<250
C2_Euk2	>4000<4500	>2500<3000	>1600	>1700	>1600	>550	>450<509	>125<250
C3_Euk1	>3500<4000	>2320<3000	>1600	>1700	>1033	>550	>450<509	>125<250
C3_Euk2	>3500<4000	>2320<3000	>1600	>1700	>1600	>550	>450<509	>125<250
C4_Euk1	>3500<4000	>2500<3000	>1600	>1700	>1033	>550	>450<509	>125<250
C4_Euk1	>3500<4000	>2500<3000	>1600	>1700	>1600	>550	>450<509	>125<250
C5_Euk2	>3000<3500	>2320<3000	>1600	>1700	>1033	>550	>450<509	>125<250
C5_Euk2	>3000<3500	>2320<3000	>1600	>1700	>1600	>550	>450<509	>125<250
C6_Euk1	>3000<3500	>2500<3000	>1600	>1700	>1033	>550	>450<509	>125<250
C6_Euk2	>3000<3500	>2500<3000	>1600	>1700	>1600	>550	>450<509	>125<250
a: The time unit in the table is Million years Ago (Ma)
