# Supplementary material for: Adaptation of Fe-S Cluster Assembly to Rising O2 Levels over Geological Time
Source: Research Square preprint supplement (doi:10.21203/rs.3.rs-7916008/v1), 2026-01-08
Supplement: Supplementary file 4 [file f7fb0ad013c511d83f6e7660.docx]

1. Title for each file:

Supplementary Information Table 1.xlsx: Supplementary Table 1

Supplementary Information Table 2.xlsx: Supplementary Table 2

Supplementary Information Table 3.xlsx: Supplementary Table 3

1. Summary for each file:

Supplementary Table 1: “Calibration Node and Time Constrain”.

Supplementary Table 2: “Marginal likelihood value of different clock models and calibration sets under the sampling mode of stepping-stone”.

Supplementary Table 3: “Primers in this research”.
